# Supplementary material for: Population pharmacokinetic‐pharmacodynamic analyses of amyloid positron emission tomography and plasma biomarkers for lecanemab in subjects with early Alzheimer's disease
Source: PubMed Central journal article supplement — CPT Pharmacometrics Syst Pharmacol. 2022 Sep 27;11(12):1578–91. doi: 10.1002/psp4.12862 (PMC9755918; doi:10.1002/psp4.12862), 2022-09-27

Figure S1. Design of Study 201 (Core and OLE)

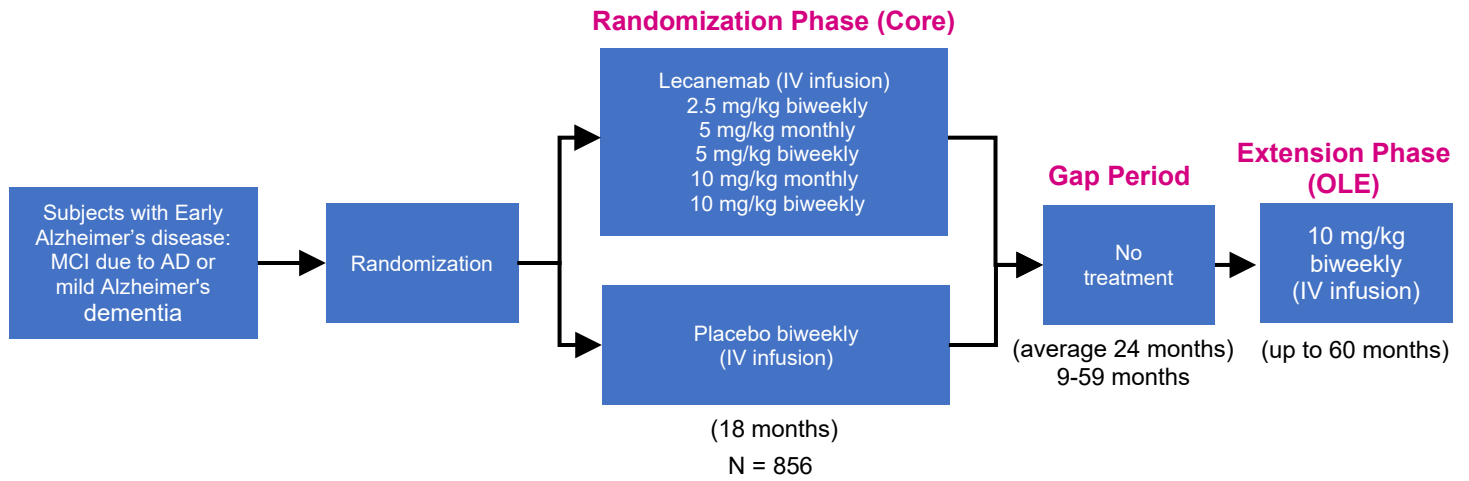

AD, Alzheimer's disease; IV, intravenous; MCI, mild cognitive impairment; OLE, open label extension

Figure S2. Goodness-of-fit plots for the final lecanemab PK model

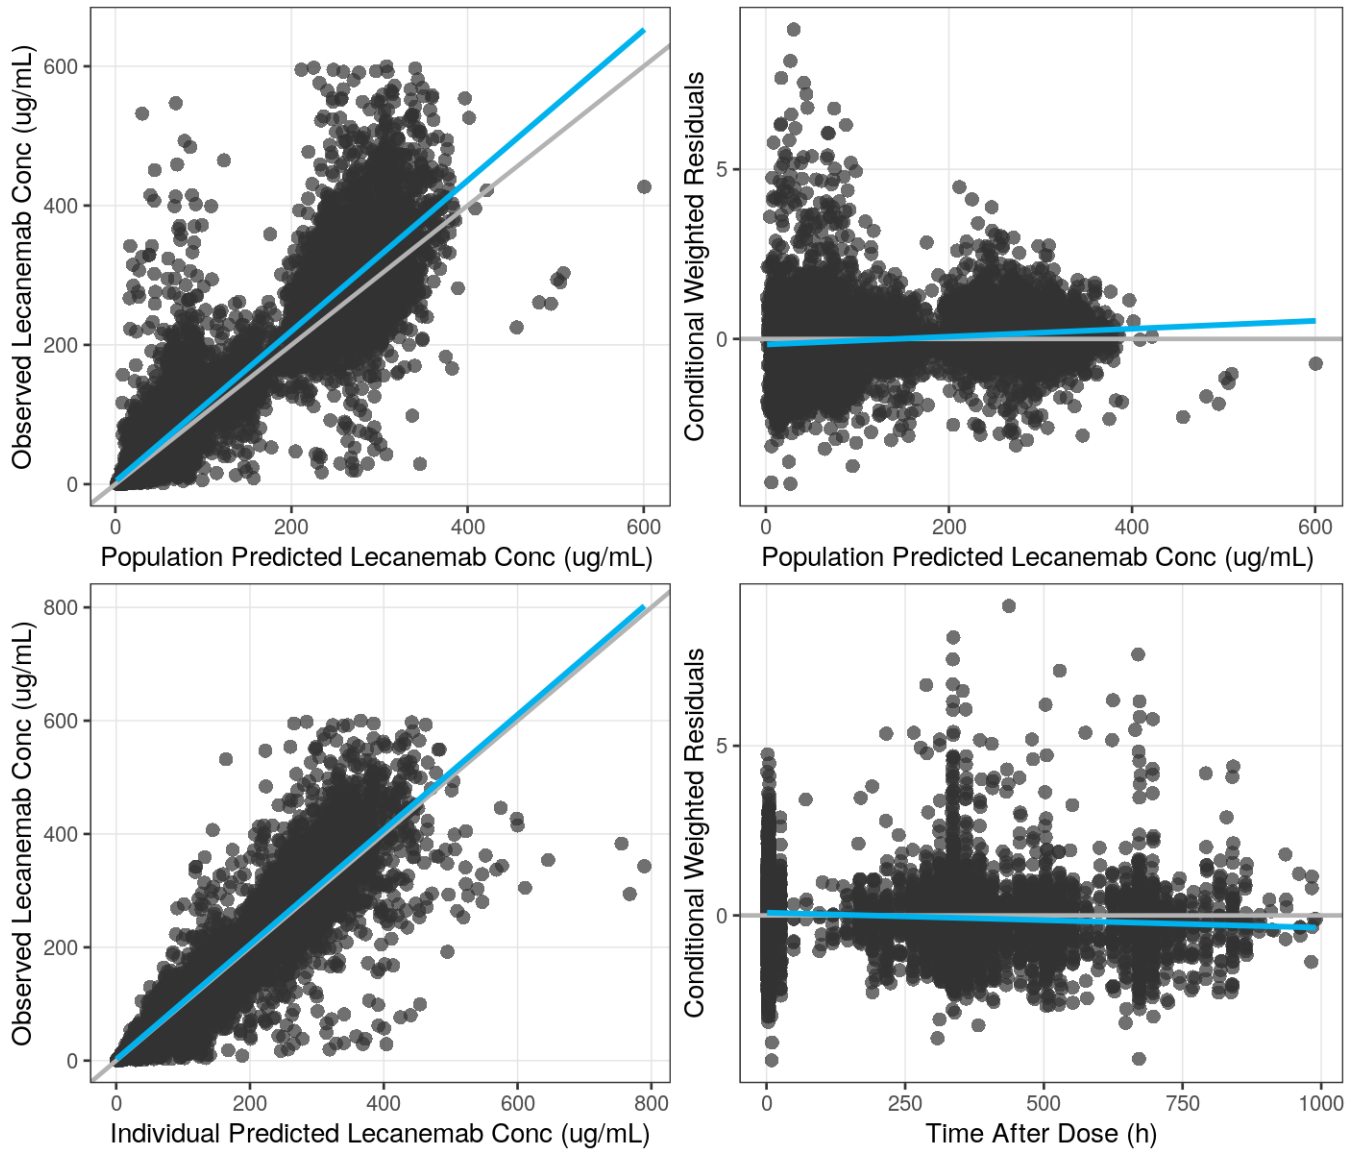

The gray line is the line of unity (predictions match observed) and the blue line is a linear regression line.

**Figure S3. Prediction-corrected visual predictive check plots of observed and predicted lecanemab concentrations for final PK model stratified by study (Top Left= 101; Top Right = 104; Bottom = 201)**

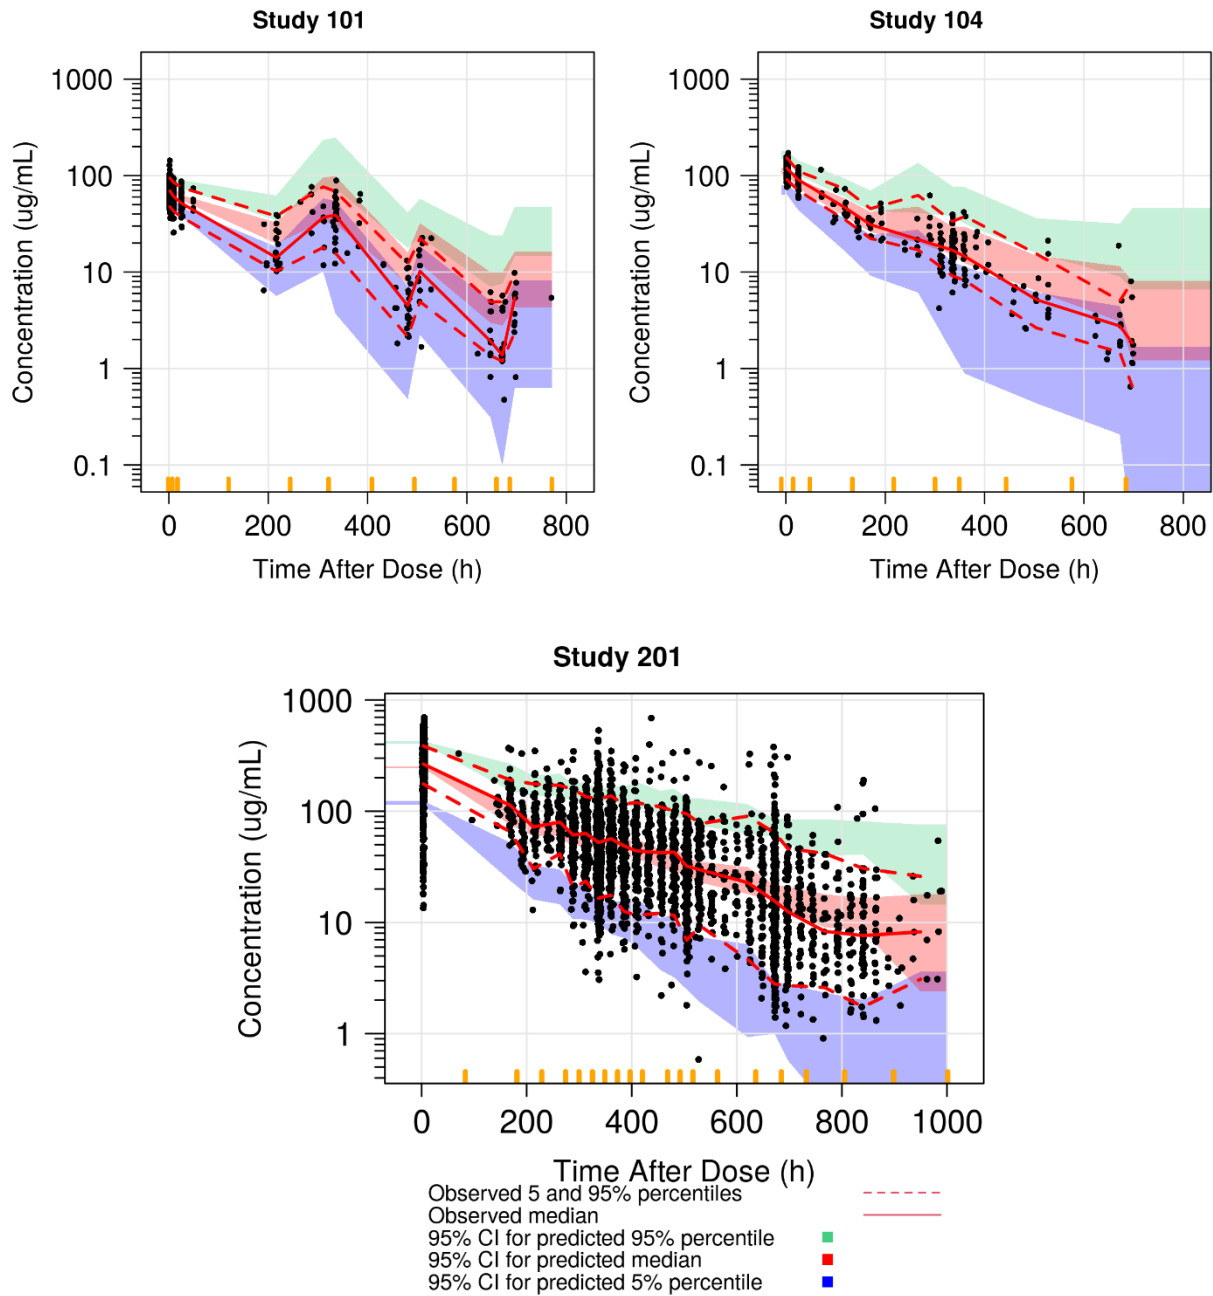

Supplement: PSP4-11-1578-s001.pdf [file PSP4-11-1578-s001.pdf]
