# Supplementary material for: Population pharmacokinetic‐pharmacodynamic analyses of amyloid positron emission tomography and plasma biomarkers for lecanemab in subjects with early Alzheimer's disease
Source: PubMed Central journal article supplement — CPT Pharmacometrics Syst Pharmacol. 2022 Sep 27;11(12):1578–91. doi: 10.1002/psp4.12862 (PMC9755918; doi:10.1002/psp4.12862), 2022-09-27
Supplement: PSP4-11-1578-s005.pdf [file PSP4-11-1578-s005.pdf]

**Figure S4. Scatter plots for the relationship between baseline SUVr and observed change from baseline in SUVr at 12 months following 10 mg/kg bi-weekly and 10 mg/kg monthly from Study 201 Core**

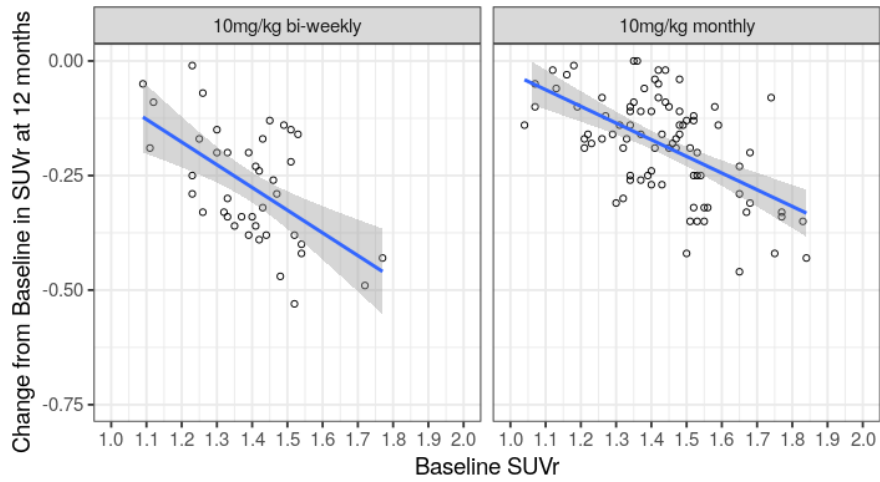

Blue line and gray area indicate the linear regression line and 95% confidence interval

**Figure S5. Effect of covariates on SUVr change from baseline at 18 months after 10 mg/kg bi-weekly**

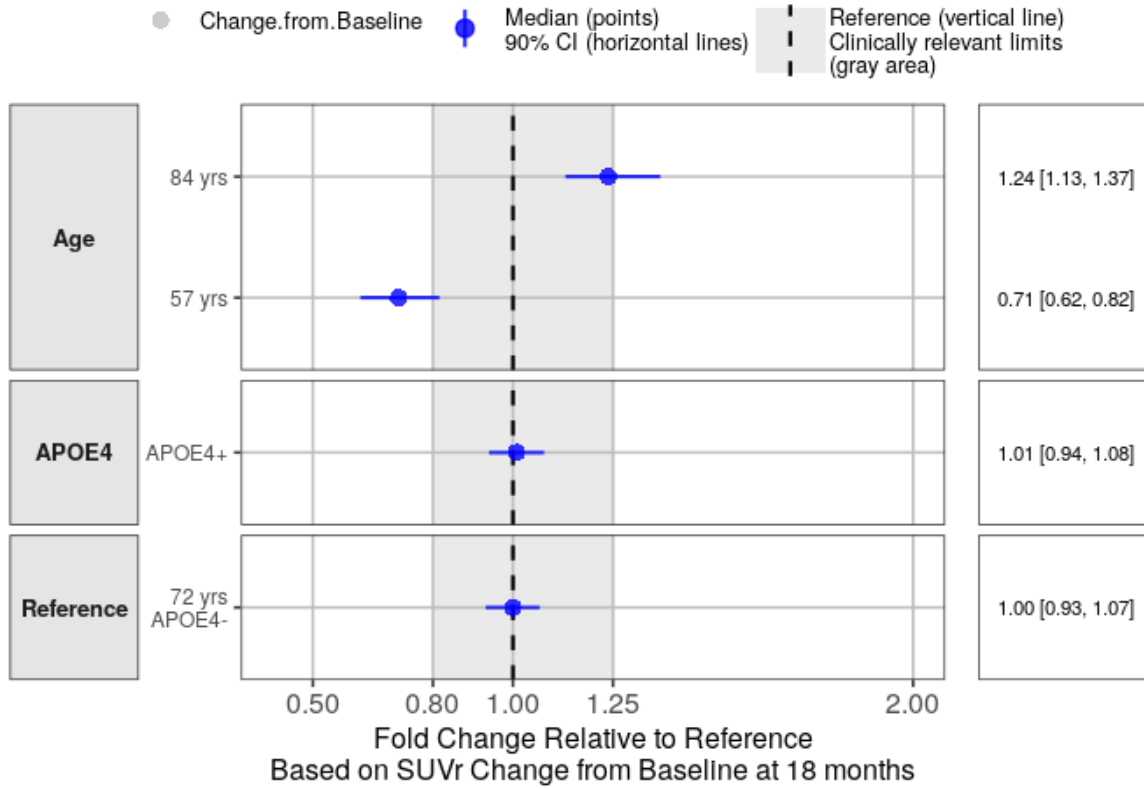

Covariate effects are expressed as SUVr change from baseline at 18 months relative to a reference subject. Age test categories (57 and 84 years) represent the 5% and 95% percentiles of the analysis set, respectively. Gray area indicates the acceptance interval (0.80 - 1.25). CI = confidence interval.

**Figure S6. Effect of covariates on plasma p-tau181 change from baseline at 18 months after 10 mg/kg bi-weekly**

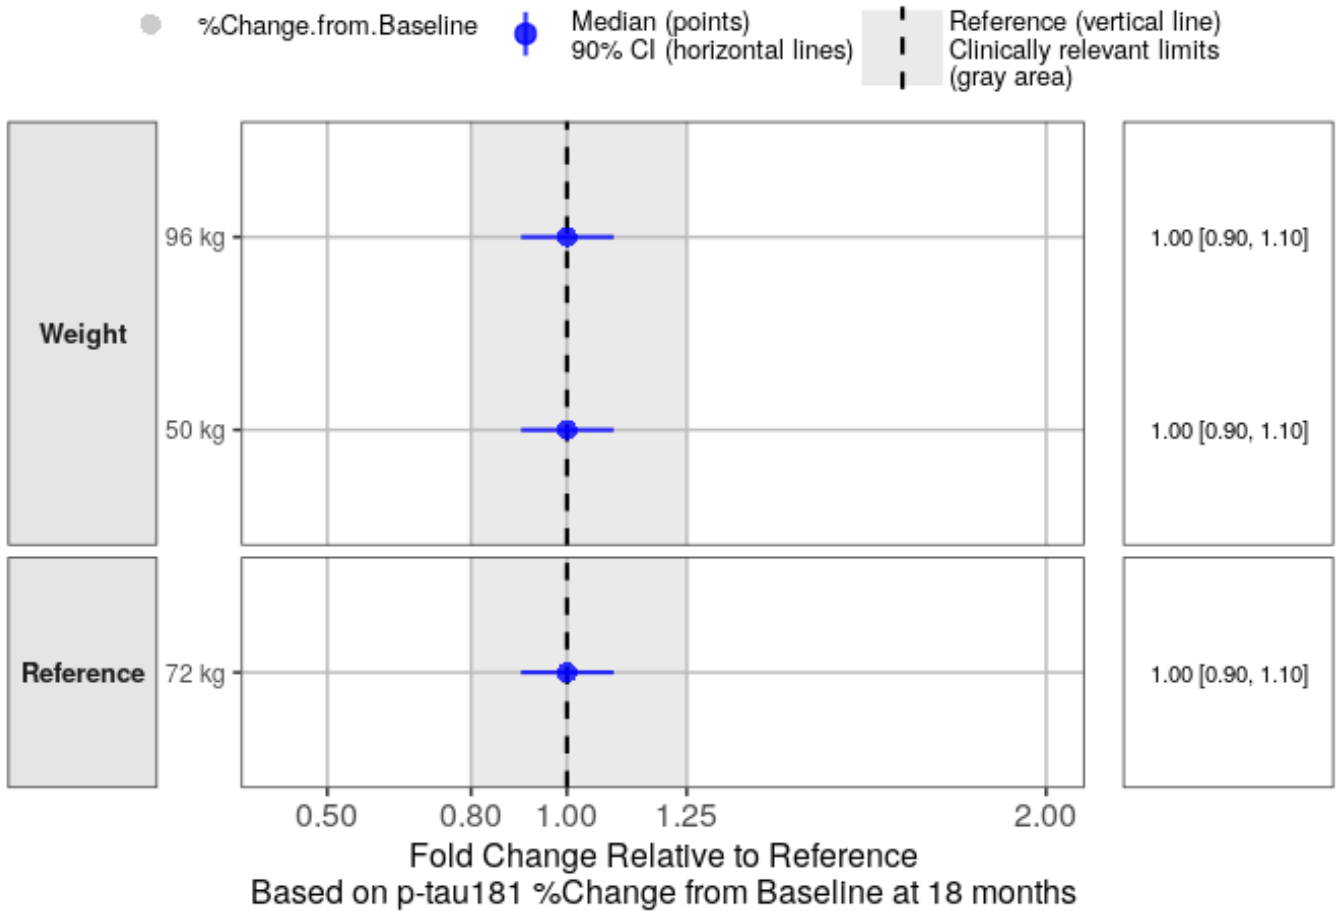

Covariate effects are expressed as plasma p-tau181 change from baseline at 18 months relative to a reference subject. Weight test categories (50 and 96 kg) represent the 5% and 95% percentiles of the analysis set, respectively. Gray area indicates the acceptance interval (0.80 - 1.25). CI = confidence interval.

Figure S7. Goodness-of-fit plots for the final SUVr PK/PD model

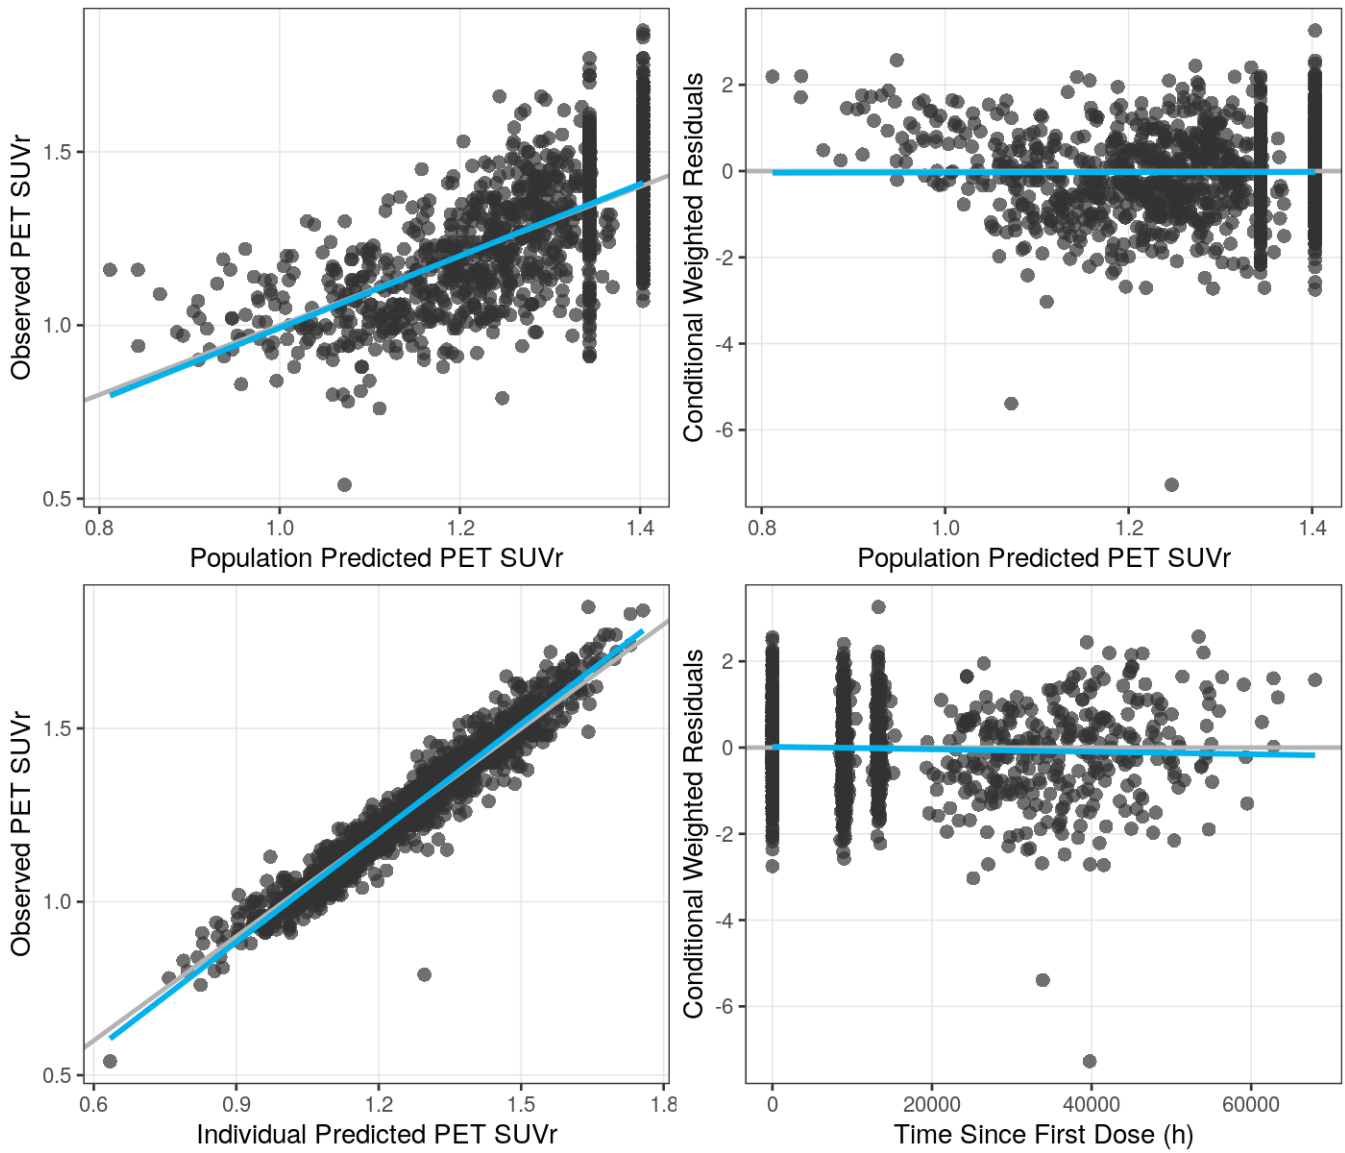

The gray line is the line of unity (predictions match observed) and the blue line is a linear regression line.

**Figure S8. Goodness-of-fit plots for the final plasma A $\beta$ 42/40 ratio PK/PD model**

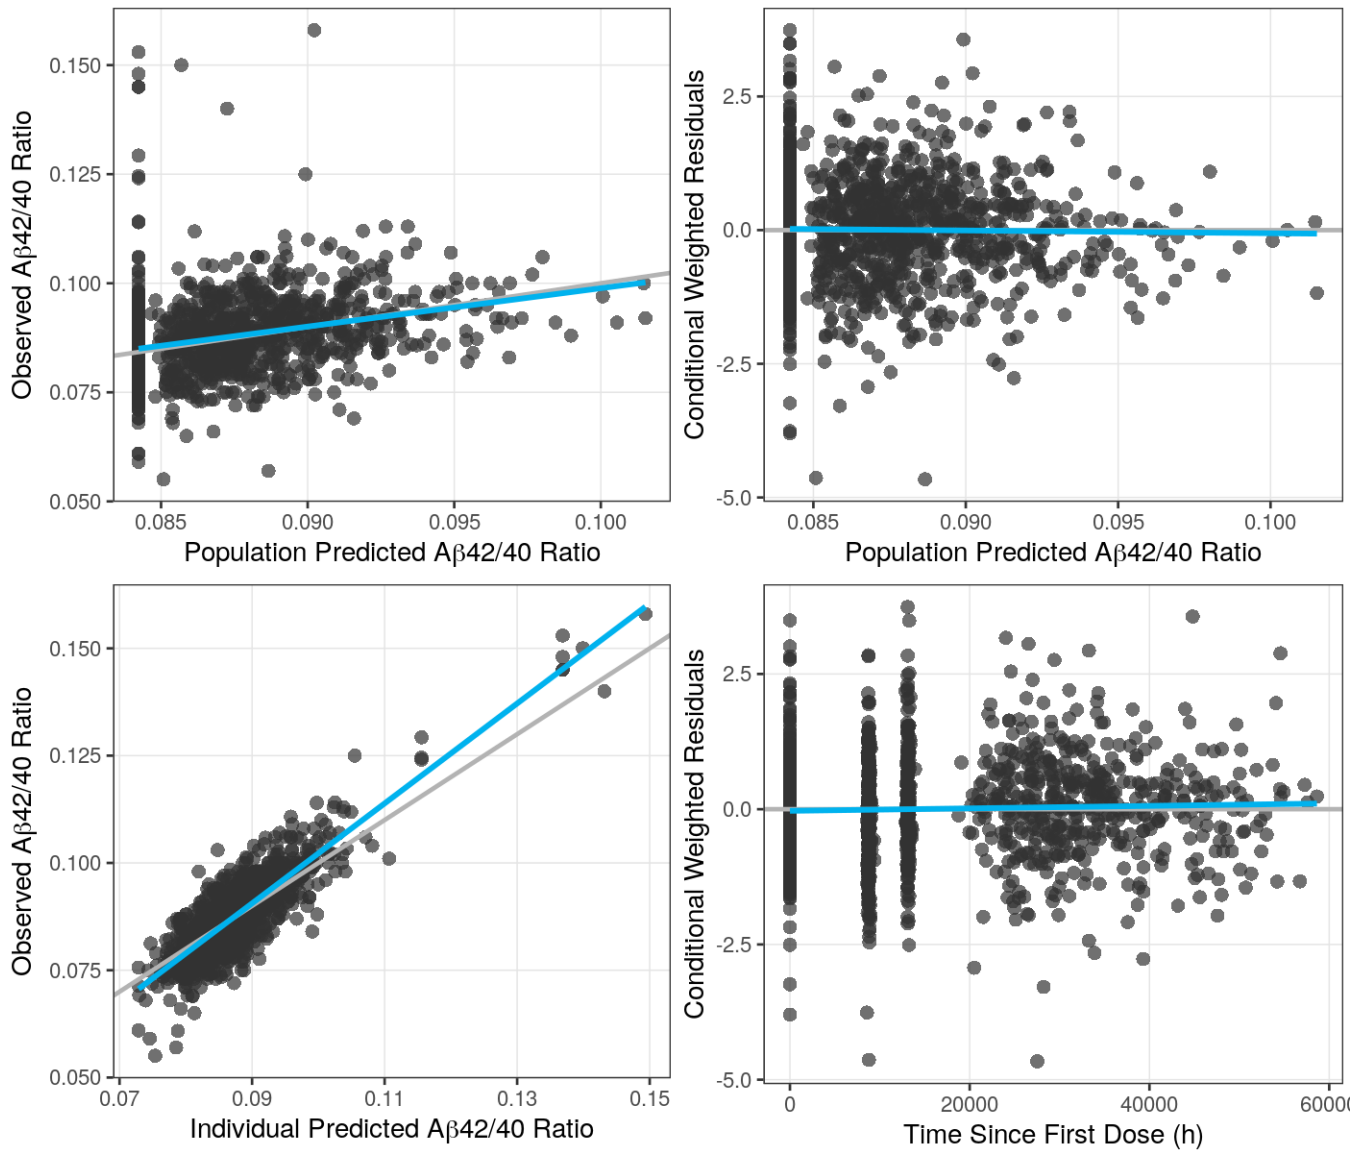

The gray line is the line of unity (predictions match observed) and the blue line is a linear regression line.

**Figure S9. Goodness-of-fit plots for the final plasma p-tau181 PK/PD model**

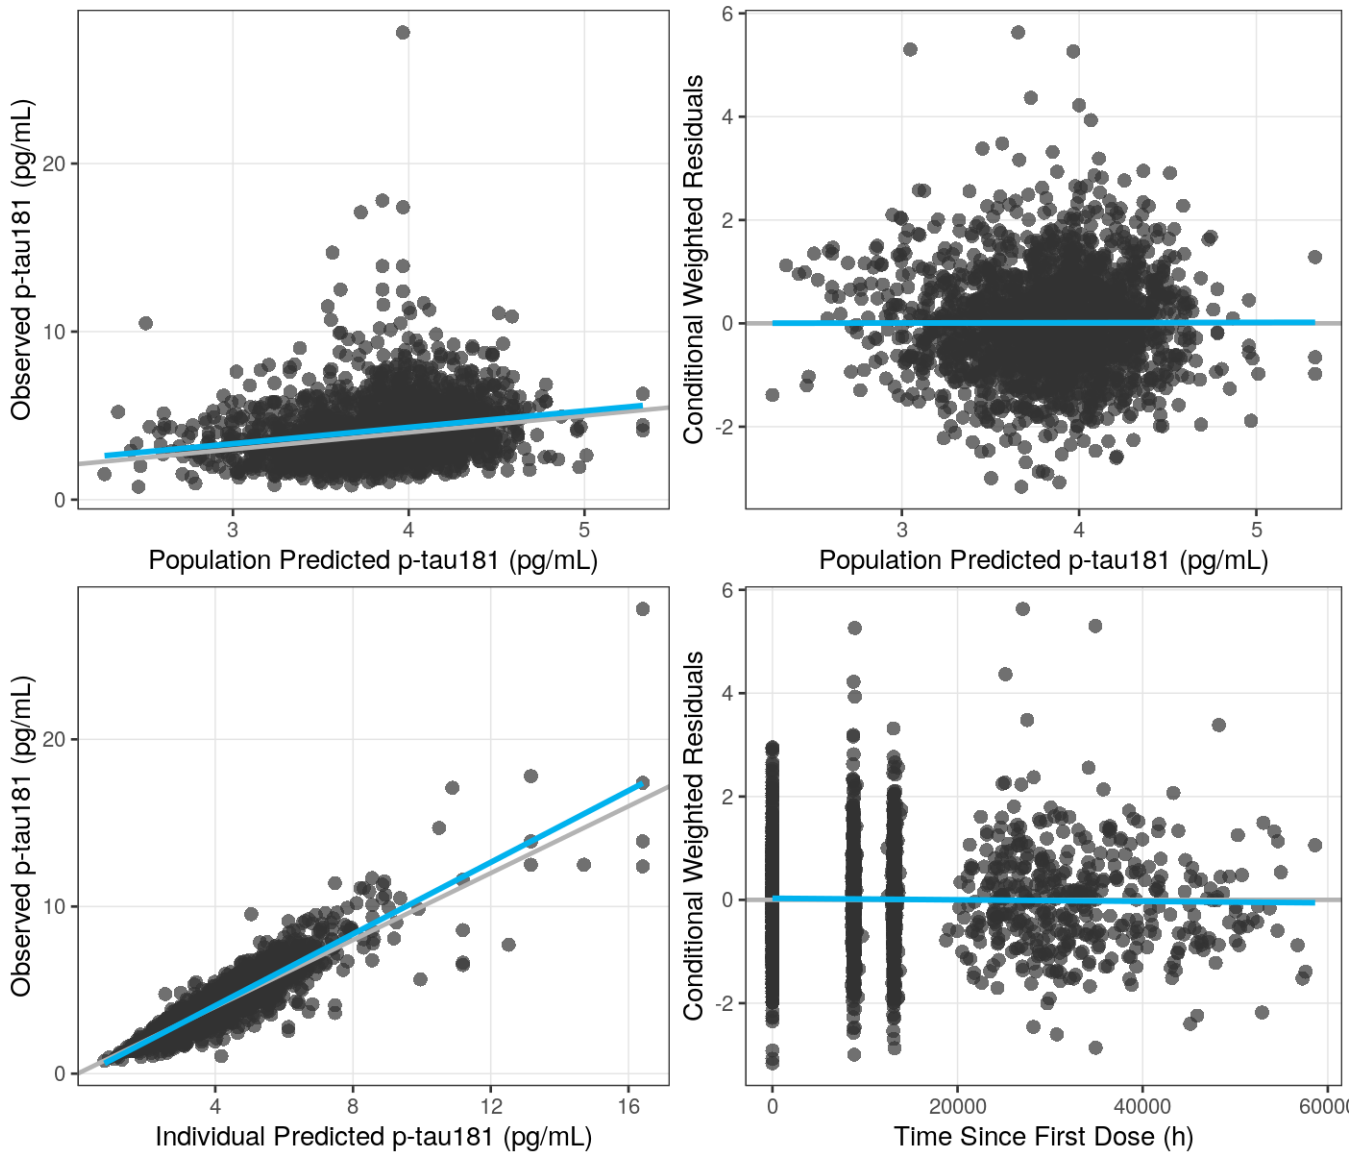

The gray line is the line of unity (predictions match observed) and the blue line is a linear regression line.
